# Supplementary material for: BIM-23A760 influences key functional endpoints in pituitary adenomas and normal pituitaries: molecular mechanisms underlying the differential response in adenomas
Source: PubMed Central journal article supplement (PMC5299479; doi:10.1038/srep42002), 2017-02-09
Supplement: srep42002-s1.pdf [file srep42002-s1.pdf]

**BIM-23A760 influences key functional endpoints in pituitary adenomas and normal pituitaries: molecular mechanisms underlying the differential response in adenomas**

Alejandro Ibáñez-Costa<sup>1,2,3,4,5</sup>, Laura M. López-Sánchez<sup>1,3</sup>, Manuel D. Gahete<sup>1,2,3,4,5</sup>, Esther Rivero-Cortés<sup>1,2,3,4,5</sup>, Mari C. Vázquez-Borrego<sup>1,2,3,4,5</sup>, María A. Gálvez<sup>1,3,6</sup>, Andrés de la Riva<sup>1,3,7</sup>, Eva Venegas-Moreno<sup>8</sup>, Luis Jiménez-Reina<sup>9</sup>, Alberto Moreno-Carazo<sup>10</sup>, Francisco J. Tinahones<sup>11</sup>, Silvia Maraver-Selfa<sup>11</sup>, Miguel A. Japón<sup>12</sup>, Juan A. García-Arnés<sup>13</sup>, Alfonso Soto-Moreno<sup>8</sup>, Susan M. Webb<sup>14</sup>, Rhonda D. Kineman<sup>15</sup>, Michael D. Culler<sup>16</sup>, Justo P. Castaño<sup>1,2,3,4,5\*</sup>, Raúl M. Luque<sup>1,2,3,4,5\*</sup>.

**Supplemental table-1.** Absolute cDNA copy number/50ng total RNA of gene transcripts in the whole pituitary versus primary pituitary cell cultures (control groups) of female baboons, as determined by quantitative real-time PCR. Values represent means  $\pm$  SEM (from 3 separate whole pituitary extracts and primary pituitary cell cultures of the same baboons).

| <b>Gene</b>           | <b>Whole pituitary</b> | <b>Primary pituitary cell cultures</b> |
|-----------------------|------------------------|----------------------------------------|
| <b>sst2</b>           | 2,182 $\pm$ 229        | 2,018 $\pm$ 309                        |
| <b>sst5</b>           | 4,465 $\pm$ 357        | 3,809 $\pm$ 479                        |
| <b>D<sub>2</sub>T</b> | 28,269 $\pm$ 4,239     | 20,347 $\pm$ 2,785                     |
| <b>D<sub>2</sub>L</b> | 16,116 $\pm$ 3,077     | 11,420 $\pm$ 1,620                     |
| <b>Cyclophilin A</b>  | 79,469 $\pm$ 5,578     | 88,280 $\pm$ 1,626                     |

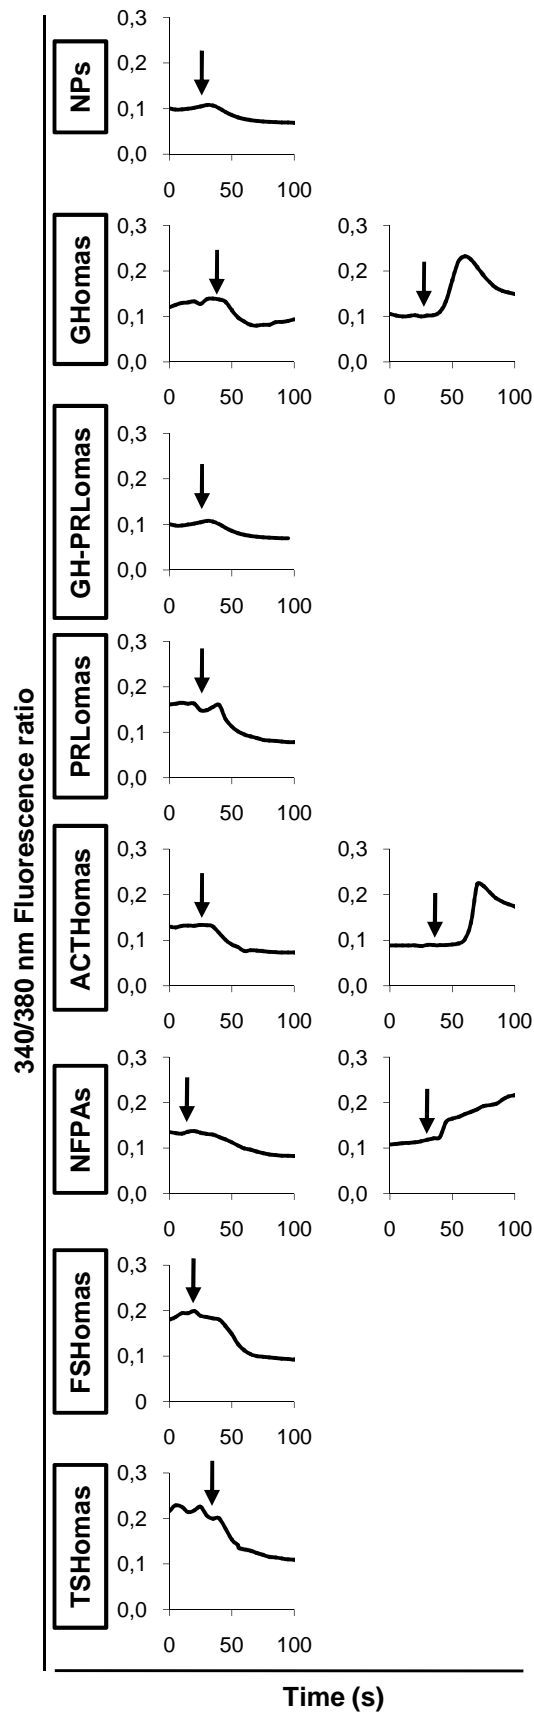

**Supplemental Figure 1.** Representative profiles of changes in  $[Ca^{2+}]_i$  in primary cell culture from normal pituitaries (NPs,  $n=4$ ) as well as from GHomas ( $n=20$ ), mixed GH/PRLomas ( $n=5$ ), PRLomas ( $n=6$ ), ACTHomas ( $n=10$ ), NFPAs ( $n=16$ ), FSHomas ( $n=1$ ) and TSHomas ( $n=2$ ) in response to BIM-23A760 administration (100 nM; arrow).
